# Supplementary material for: Co-existing intermolecular halogen bonding, aryl packing and hydrogen bonding in driving the self-assembly process of Keggin polyoxometalates
Source: Royal Society of Chemistry journal article supplement (doi:10.1039/b501922b), 2005-01-01

**Supplementary materials:**

S-Figure 1. XPS spectrum of compound 2.

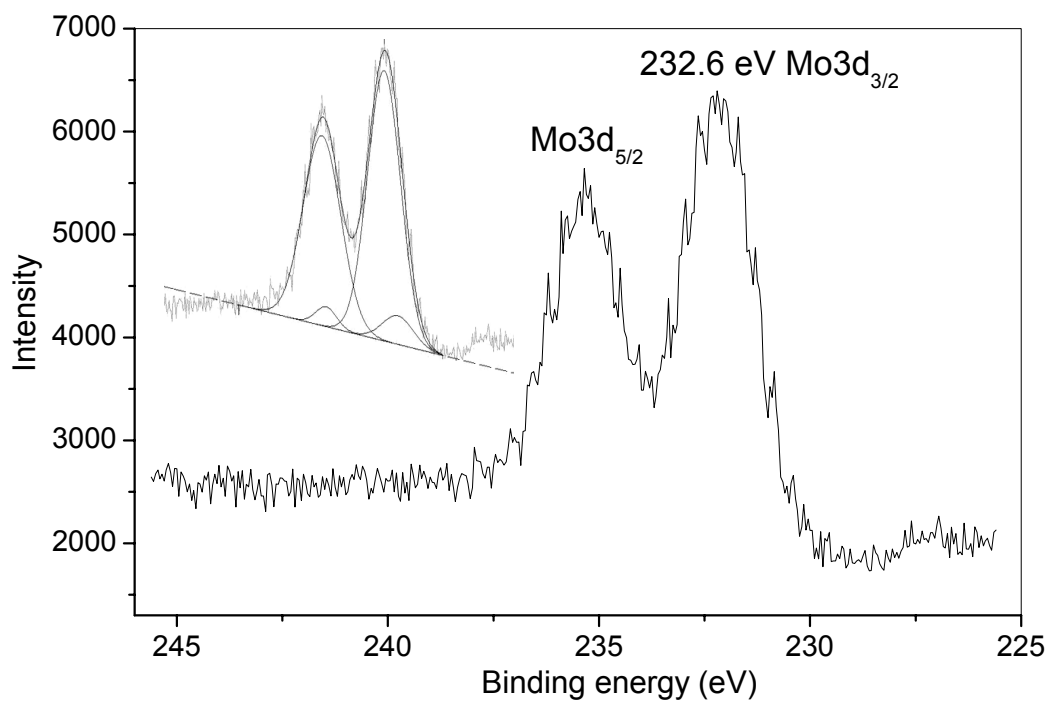

S-Figure 2. The Inorganic networks in compounds 1, 2 and 4.

Compound 1:

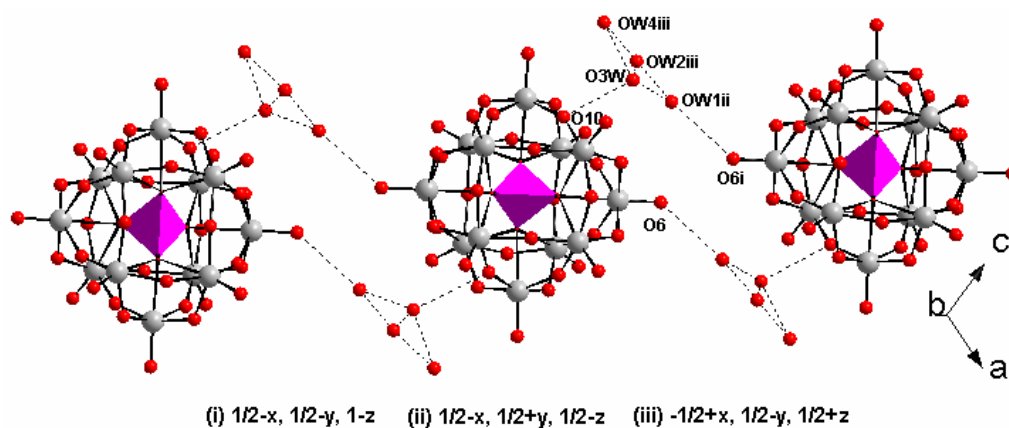

Compound 2:

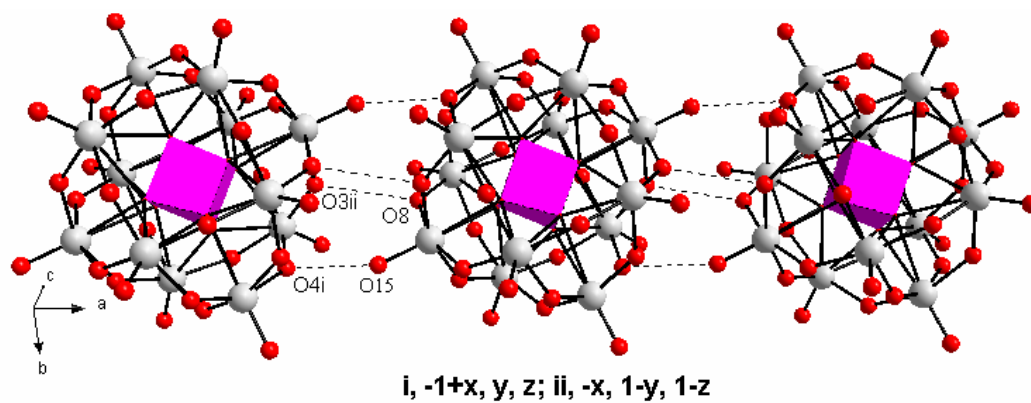

Compound 4:

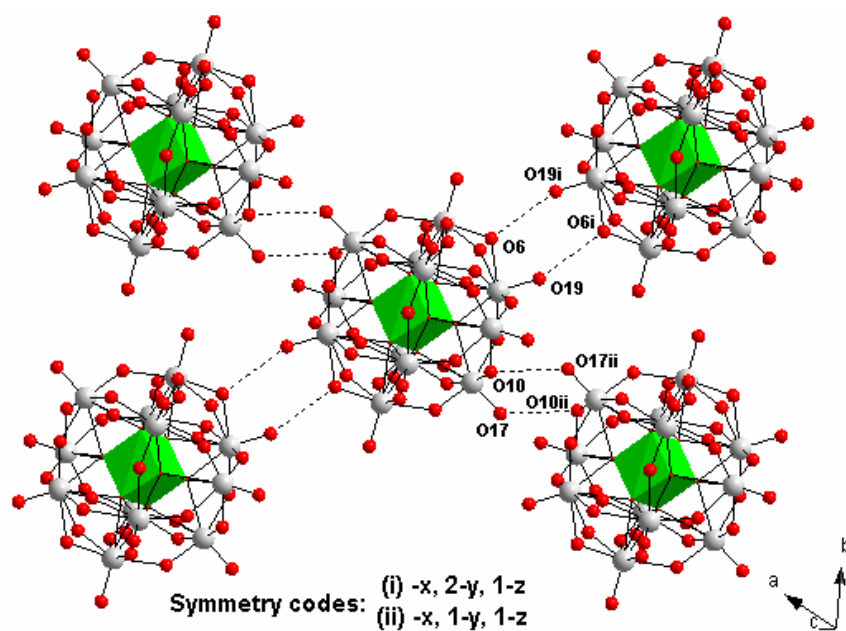

Supplement: b501922b.pdf [file b501922b.pdf]
